# Supplementary material
Source: PubMed Central journal article supplement (PMC7557497)
Supplement: jamadermatol-e203630-s001.pdf [file jamadermatol-e203630-s001.pdf]

## Supplementary Online Content

van Straalen KR, Prens EP, Willemsen G, Boomsma DI, van der Zee HH.

Contribution of genetics to the susceptibility to hidradenitis suppurativa in a large, cross-sectional Dutch twin cohort. *JAMA Dermatol*. Published online October 14, 2020. doi:10.1001/jamadermatol.2020.3630

**eFigure.** Liability Threshold Model

**eTable.** Standardized Variance Components and Goodness-of-Fit Statistics Worst-Case Scenario

This supplementary material has been provided by the authors to give readers additional information about their work.

**eFigure.** Liability Threshold Model

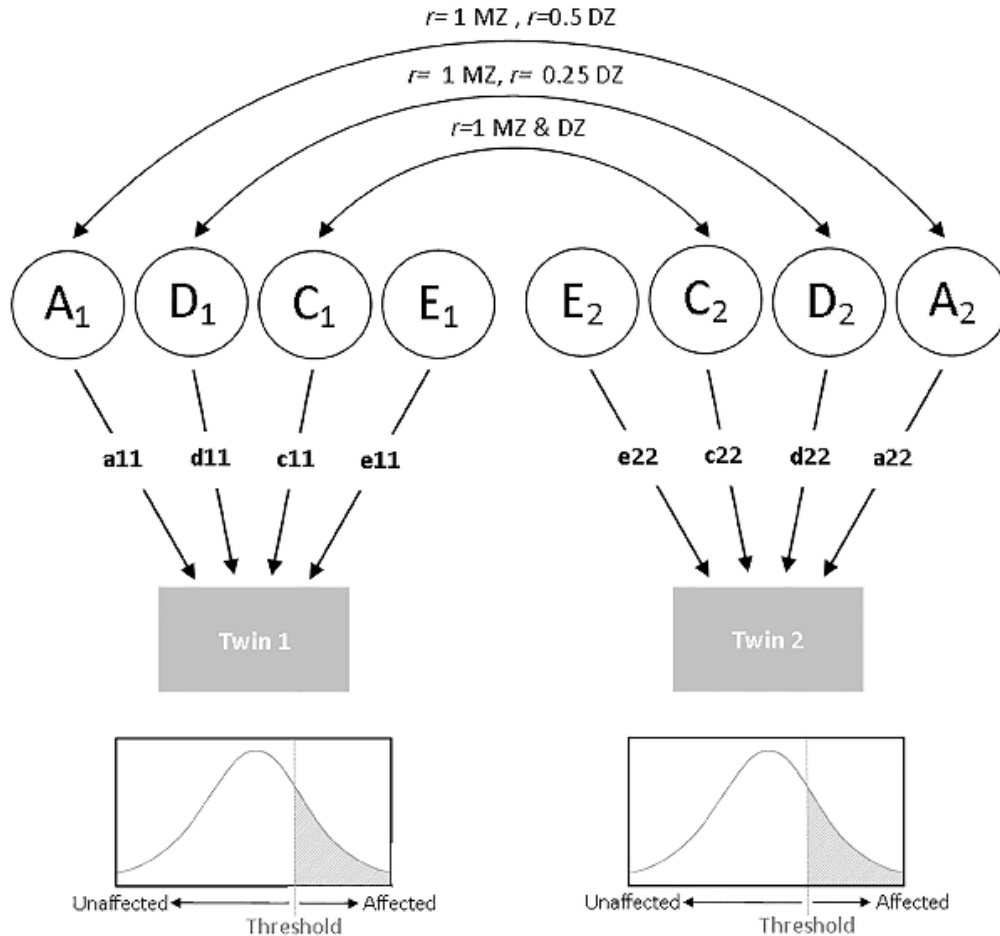

Note that D and C cannot be estimated in one model, so separate ACE and ADE models need to be constructed.

Abbreviations: a path, coefficient for A; A, additive genetic factors; c path, coefficient for C; C, common/shared environmental factors; d path, coefficient for D; D, dominant genetic factors; DZ, dizygotic; e path, coefficient for E; E, unique/unshared environmental factors; MZ, monozygotic twins.

**eTable.** Standardized Variance Components and Goodness-of-Fit Statistics Worst-Case Scenario

| Model                                  | Standardized Variance Components |                   |                   | Fit Statistics |              |                   |               |       |         | Heritability            |              |
|----------------------------------------|----------------------------------|-------------------|-------------------|----------------|--------------|-------------------|---------------|-------|---------|-------------------------|--------------|
|                                        | A                                | C / D             | E                 | AIC            | $\Delta$ AIC | -2LL              | $\Delta$ -2LL | ep    | p-value | h <sup>2</sup> (95% CI) |              |
| <b><u>Hidradenitis suppurativa</u></b> |                                  |                   |                   |                |              |                   |               |       |         |                         |              |
| <b>Threshold model fitting</b>         | Saturated                        |                   |                   | -9667.37       | -            | 340.63            | -             | 8     | -       |                         |              |
|                                        | Covariate Age                    |                   |                   | -9671.37       | -4.00        | 340.63            | 0.00          | 6     | 1.00    |                         |              |
|                                        | Threshold T1 = T2 <sup>1</sup>   |                   |                   | -9674.98       | 7.61         | 341.02            | 0.39          | 4     | 0.98    |                         |              |
|                                        | Threshold MZ = DZ                |                   |                   | -9673.50       | 6.31         | 342.50            | 1.88          | 4     | 0.76    |                         |              |
| <b>Genetic model fitting</b>           | ACE                              | 0.75              | 0.00              | 0.25           | -9674.03     | 0.95 <sup>2</sup> | 341.97        | 0.95  | 5       | -                       |              |
|                                        | ADE                              | 0.00              | 0.77              | 0.23           | -9674.63     | 0.35 <sup>2</sup> | 341.37        | 0.35  | 5       | -                       |              |
|                                        | AE <sup>1</sup>                  | 0.75              | 0.00 <sup>3</sup> | 0.25           | -9676.03     | -2.00             | 341.97        | 0.00  | 4       | 1.00                    | 75% (37-93%) |
|                                        | CE                               | 0.00 <sup>3</sup> | 0.59              | 0.41           | -9673.26     | 0.77              | 344.74        | 2.78  | 4       | 0.10                    |              |
|                                        | E                                | 0.00 <sup>3</sup> | 0.00 <sup>3</sup> | 1.00           | -9664.91     | 9.12              | 355.09        | 13.12 | 3       | <0.01                   |              |

A, C, D, and E represent the proportion of the variance explained by respectively additive genetic, dominant genetic, common environmental, and unique environmental effects. -2LL = minus 2 log likelihood,  $\Delta$ -2LL = the difference in -2LL between the submodel and the main model, ep = estimated parameters, AIC = Akaike information criterion,  $\Delta$ AIC = the difference in AIC between the submodel and the main model, h<sup>2</sup> represents the narrow sense heritability, defined as the proportion of genetic variance (A+D) to total phenotypic variance. <sup>1</sup> indicates the best fitting model. <sup>2</sup>compared with best threshold model. <sup>3</sup> indicates fixed values
